# Supplementary material
Source: MDPI journal article supplement (https://www.mdpi.com/2073-4344/13/1/103)
Supplement: s1 [file s1]

## Supplementary Materials

# Production of Biomodified Bleached Kraft Pulp by Catalytic Conversion Using *Penicillium verruculosum* Enzymes: Composition, Properties, Structure, and Application

Aleksandr R. Shevchenko, Irina V. Tyshkunova, Dmitry G. Chukhchin, Alexey V. Malkov, Evgeniy A. Toptunov, Vadim D. Telitsin, Aleksandra M. Rozhkova, Olga A. Sinitsyna, Iosif V. Gofman and Andrey S. Aksenov

**Table S1.** The concentration of sugars in the hydrolysate after enzymatic hydrolysis at various stages of conversion.

| Hydrolysis<br>time. h | Concentration. g/L |             |             |             |             |             |
|-----------------------|--------------------|-------------|-------------|-------------|-------------|-------------|
|                       | glucose            | xylobiose   | xylose      | mannose     | arabinose   | galactose   |
| 1                     | 16.2 ± 1.78        | 7.15 ± 0.89 | 1.62 ± 0.22 | 0.28 ± 0.02 | <0.20       | <0.20       |
| 2                     | 18.9 ± 3.78        | 8.38 ± 0.32 | 1.75 ± 0.17 | 0.37 ± 0.13 | <0.20       | <0.20       |
| 3                     | 20.8 ± 3.42        | 8.69 ± 2.10 | 2.20 ± 1.16 | 0.49 ± 0.25 | <0.20       | <0.20       |
| 4                     | 22.7 ± 3.17        | 9.91 ± 0.67 | 2.96 ± 0.96 | 0.67 ± 0.29 | <0.20       | 0.21 ± 0.08 |
| 5                     | 25.0 ± 5.47        | 9.71 ± 1.30 | 2.93 ± 1.21 | 0.66 ± 0.22 | <0.20       | 0.24 ± 0.09 |
| 6                     | 31.0 ± 0.68        | 9.96 ± 1.30 | 4.83 ± 3.61 | 1.17 ± 0.33 | <0.20       | 0.47 ± 0.12 |
| 24                    | 39.0 ± 8.05        | 8.84 ± 0.14 | 6.00 ± 2.03 | 1.38 ± 0.59 | <0.20       | 0.63 ± 0.14 |
| 48                    | 49.4 ± 8.77        | 8.37 ± 0.21 | 8.68 ± 3.96 | 2.00 ± 0.97 | 0.24 ± 0.02 | 1.33 ± 0.33 |
| 72                    | 58.5 ± 8.22        | 7.41 ± 0.60 | 10.3 ± 3.81 | 2.15 ± 0.86 | 0.24 ± 0.03 | 1.69 ± 0.41 |
